# Supplementary material
Source: PubMed Central journal article supplement (PMC4250937)

**Figure S1: Chromosomal Locations of 184Aa CNVs and Mutations**

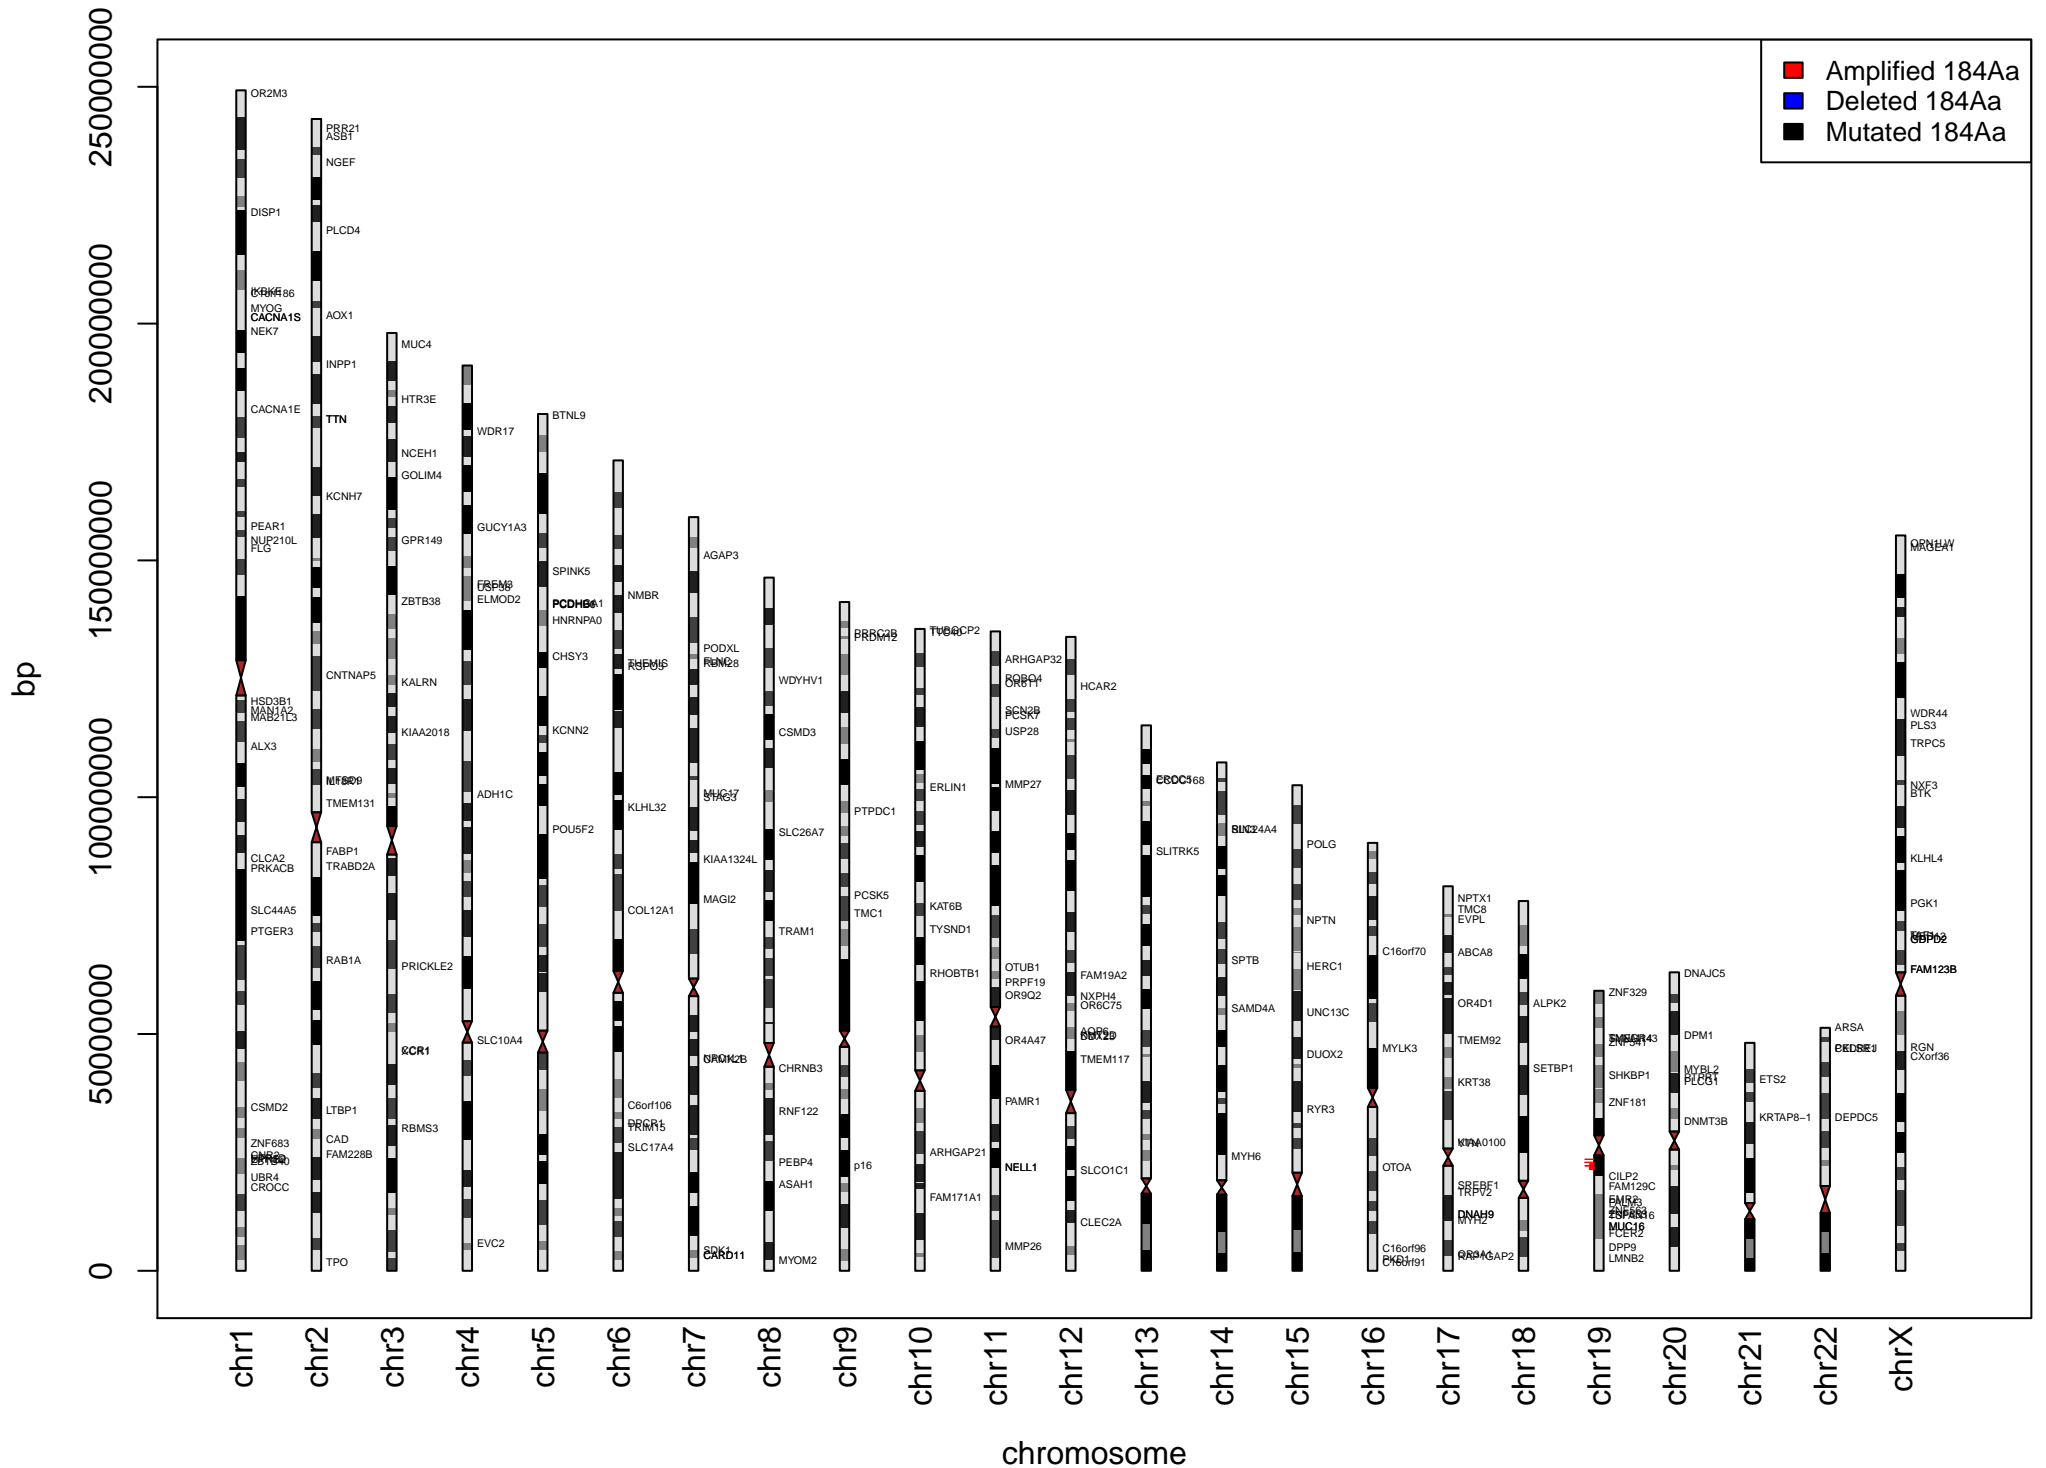

### Figure S2: Chromosomal Locations of 184Be CNVs and Mutations

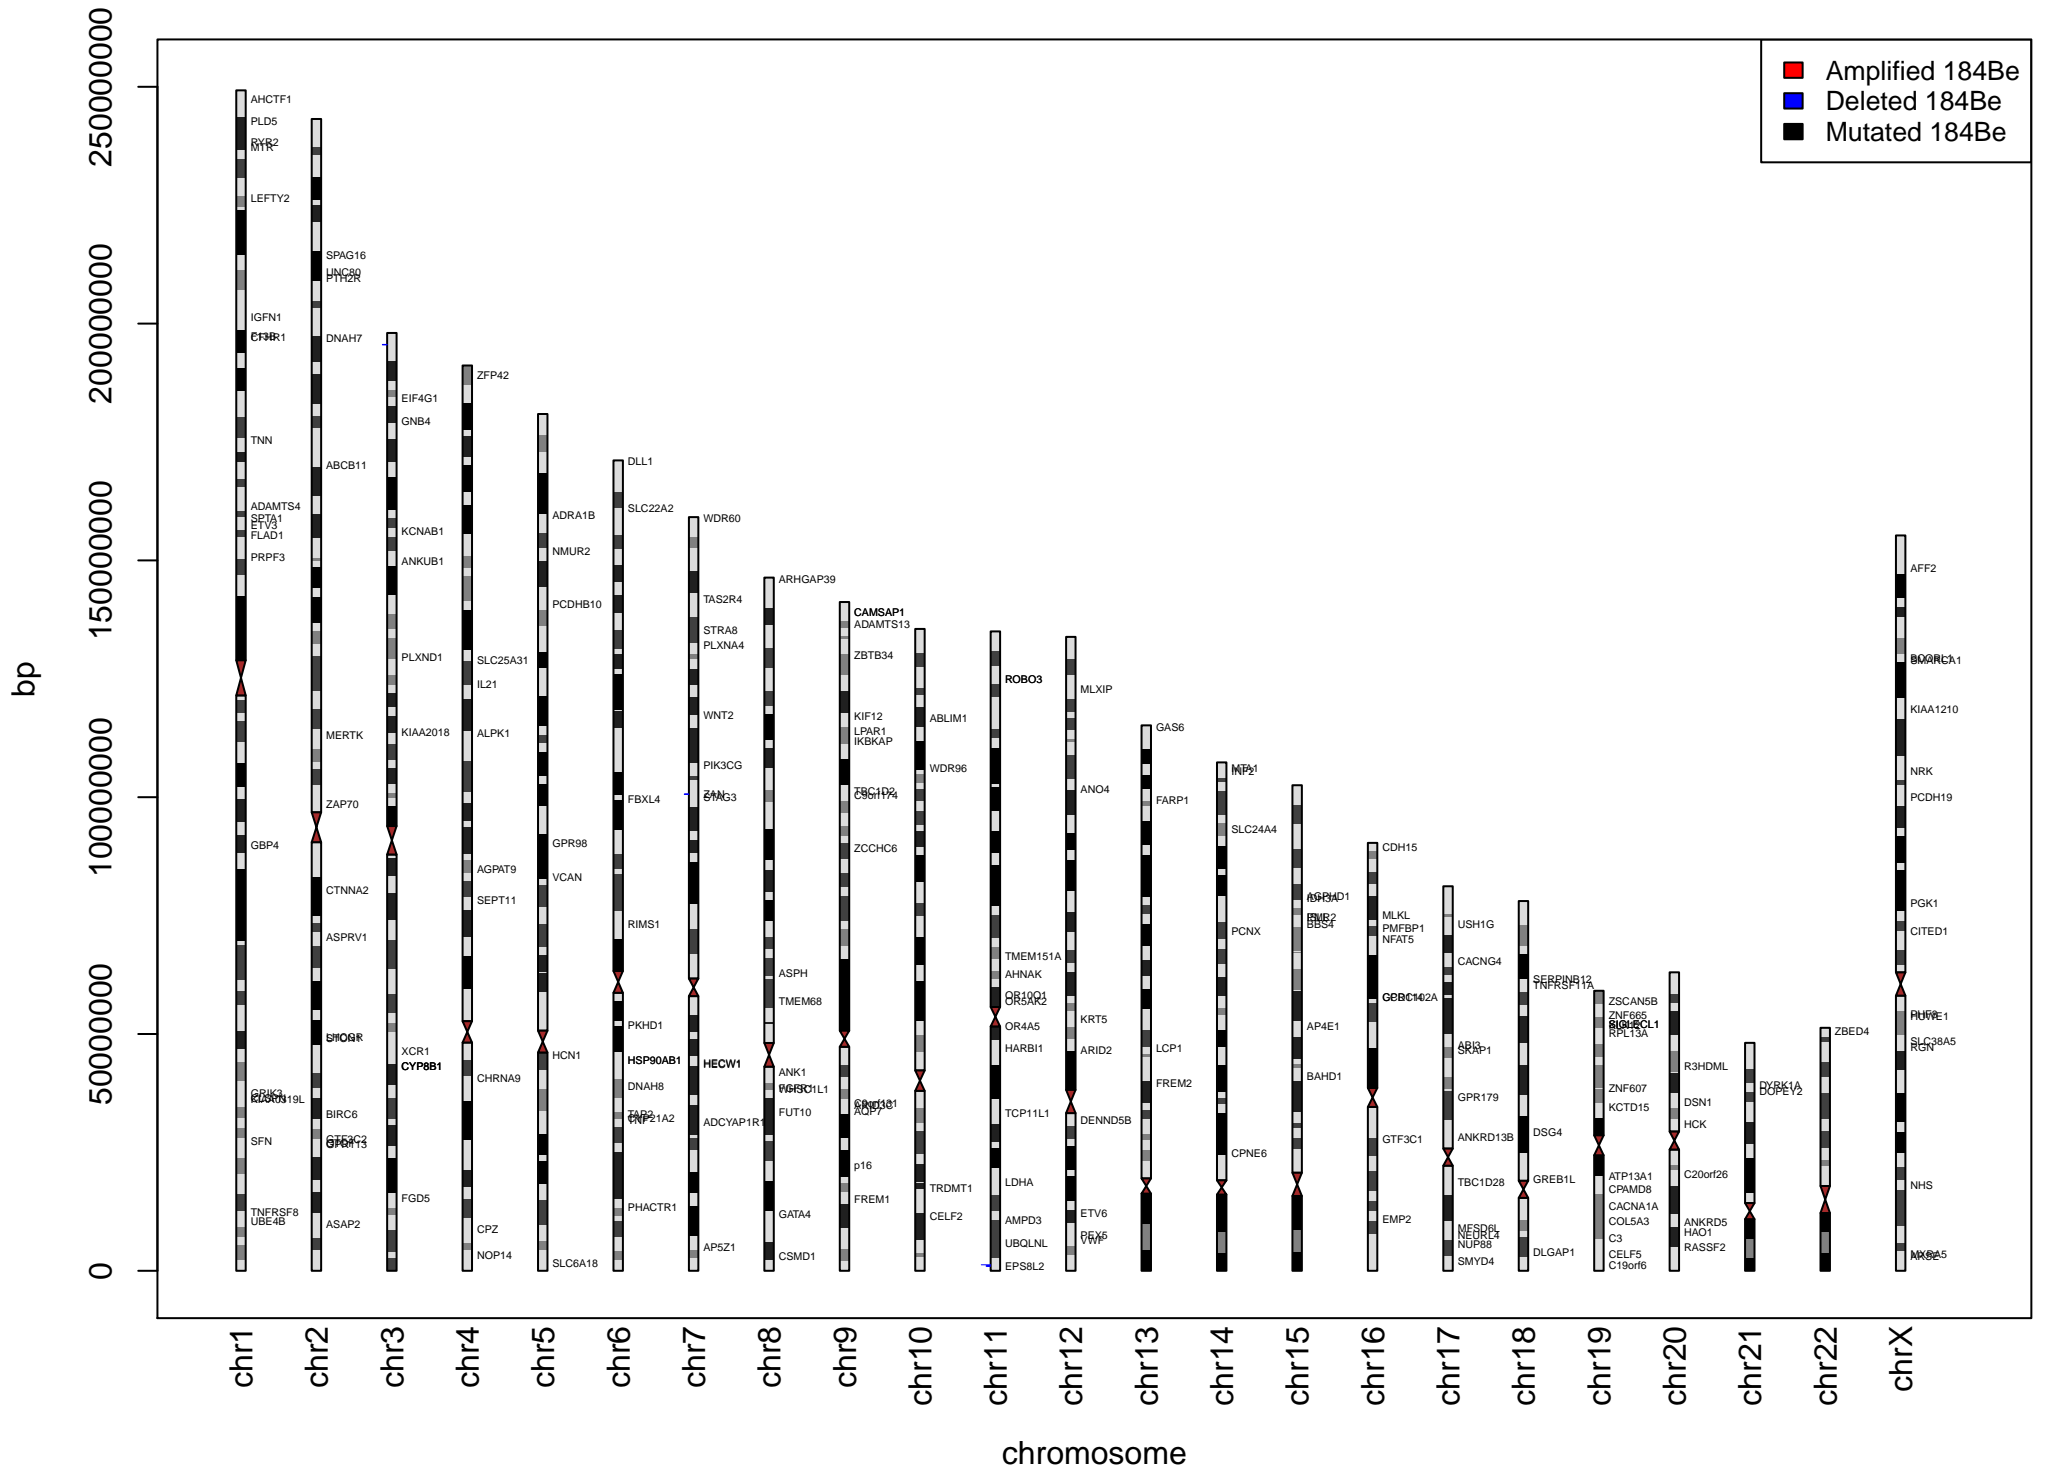

Figure S3: Chromosomal Locations of <sup>184</sup>Ce CNVs and Mutations

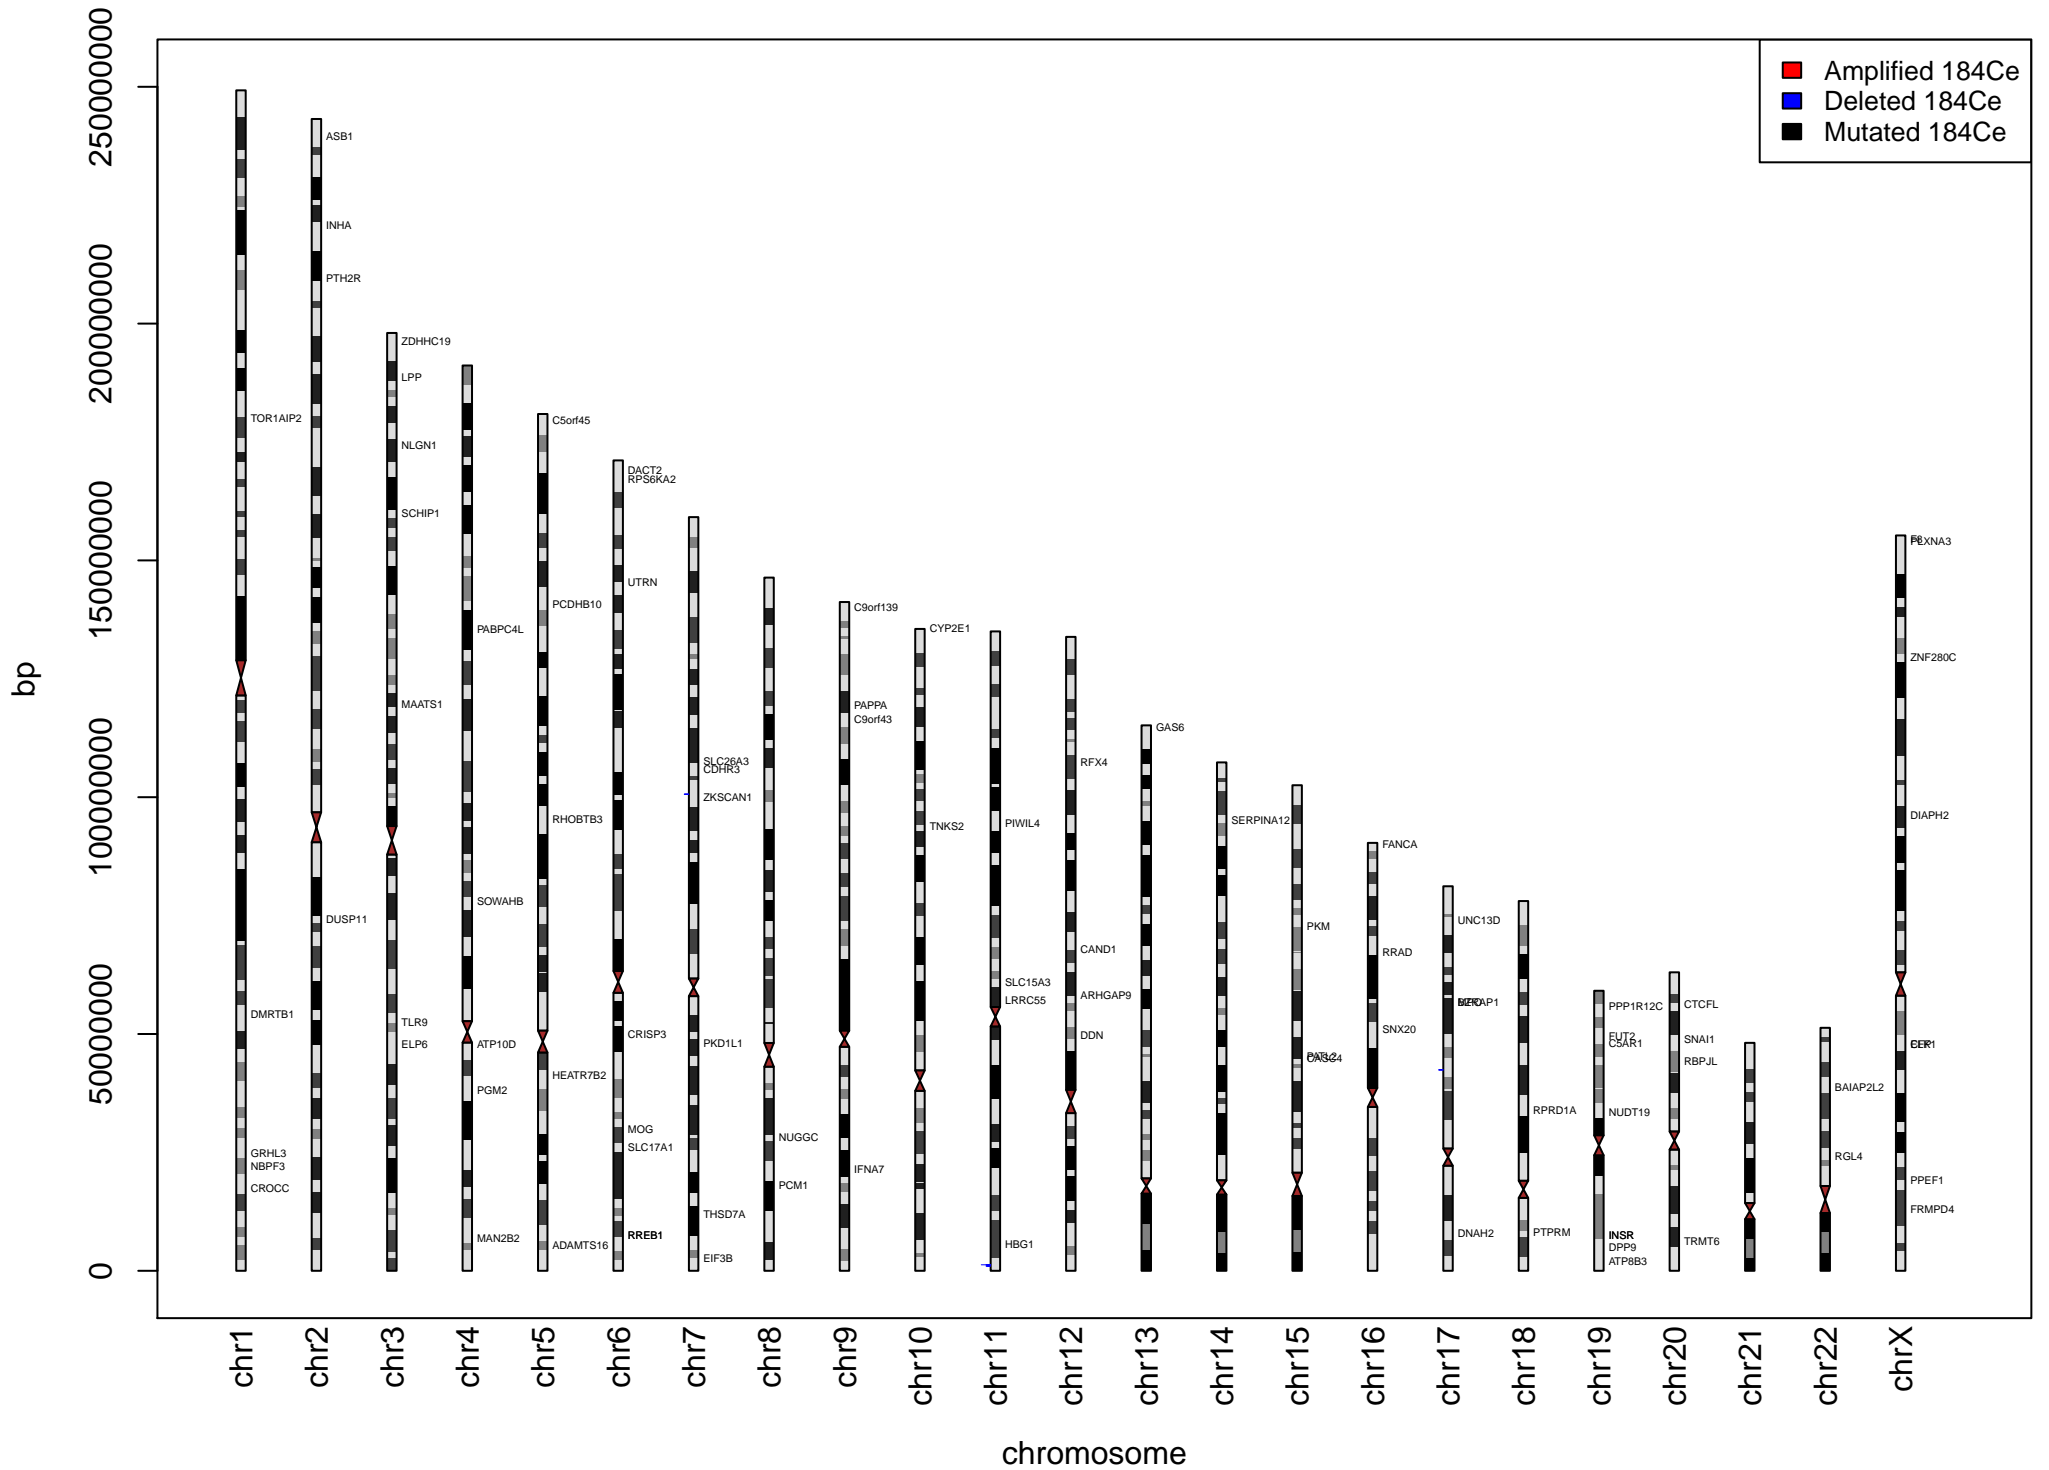

## Figure S4: Chromosomal Locations of 184A1 CNVs and Mutations

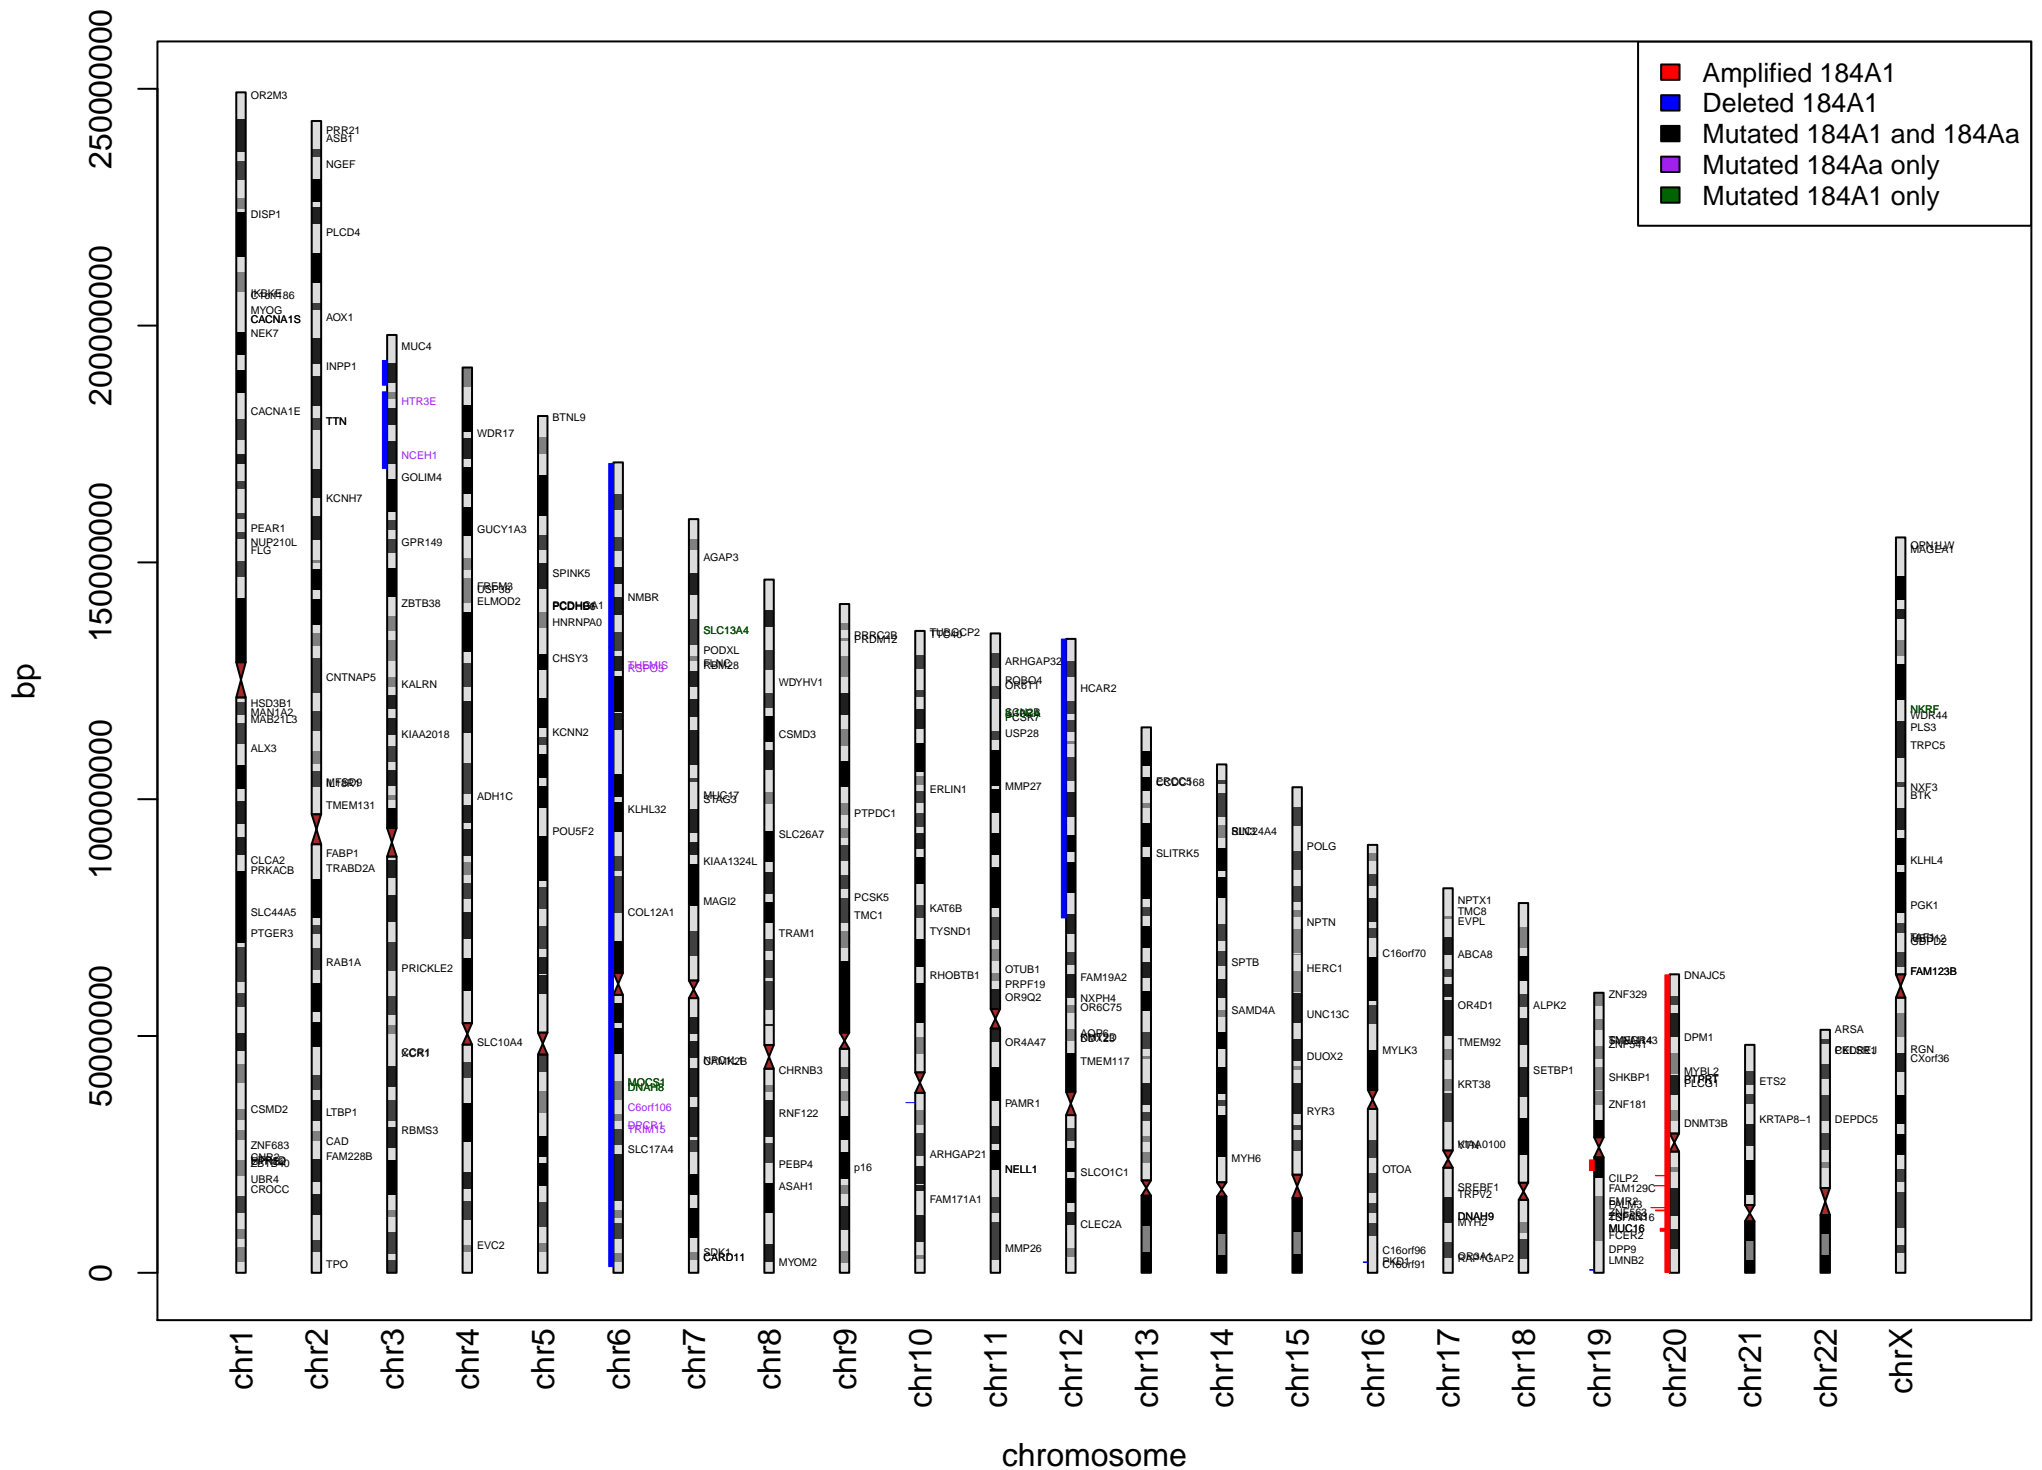

Figure S5: Chromosomal Locations of 184BE1 CNVs and Mutations

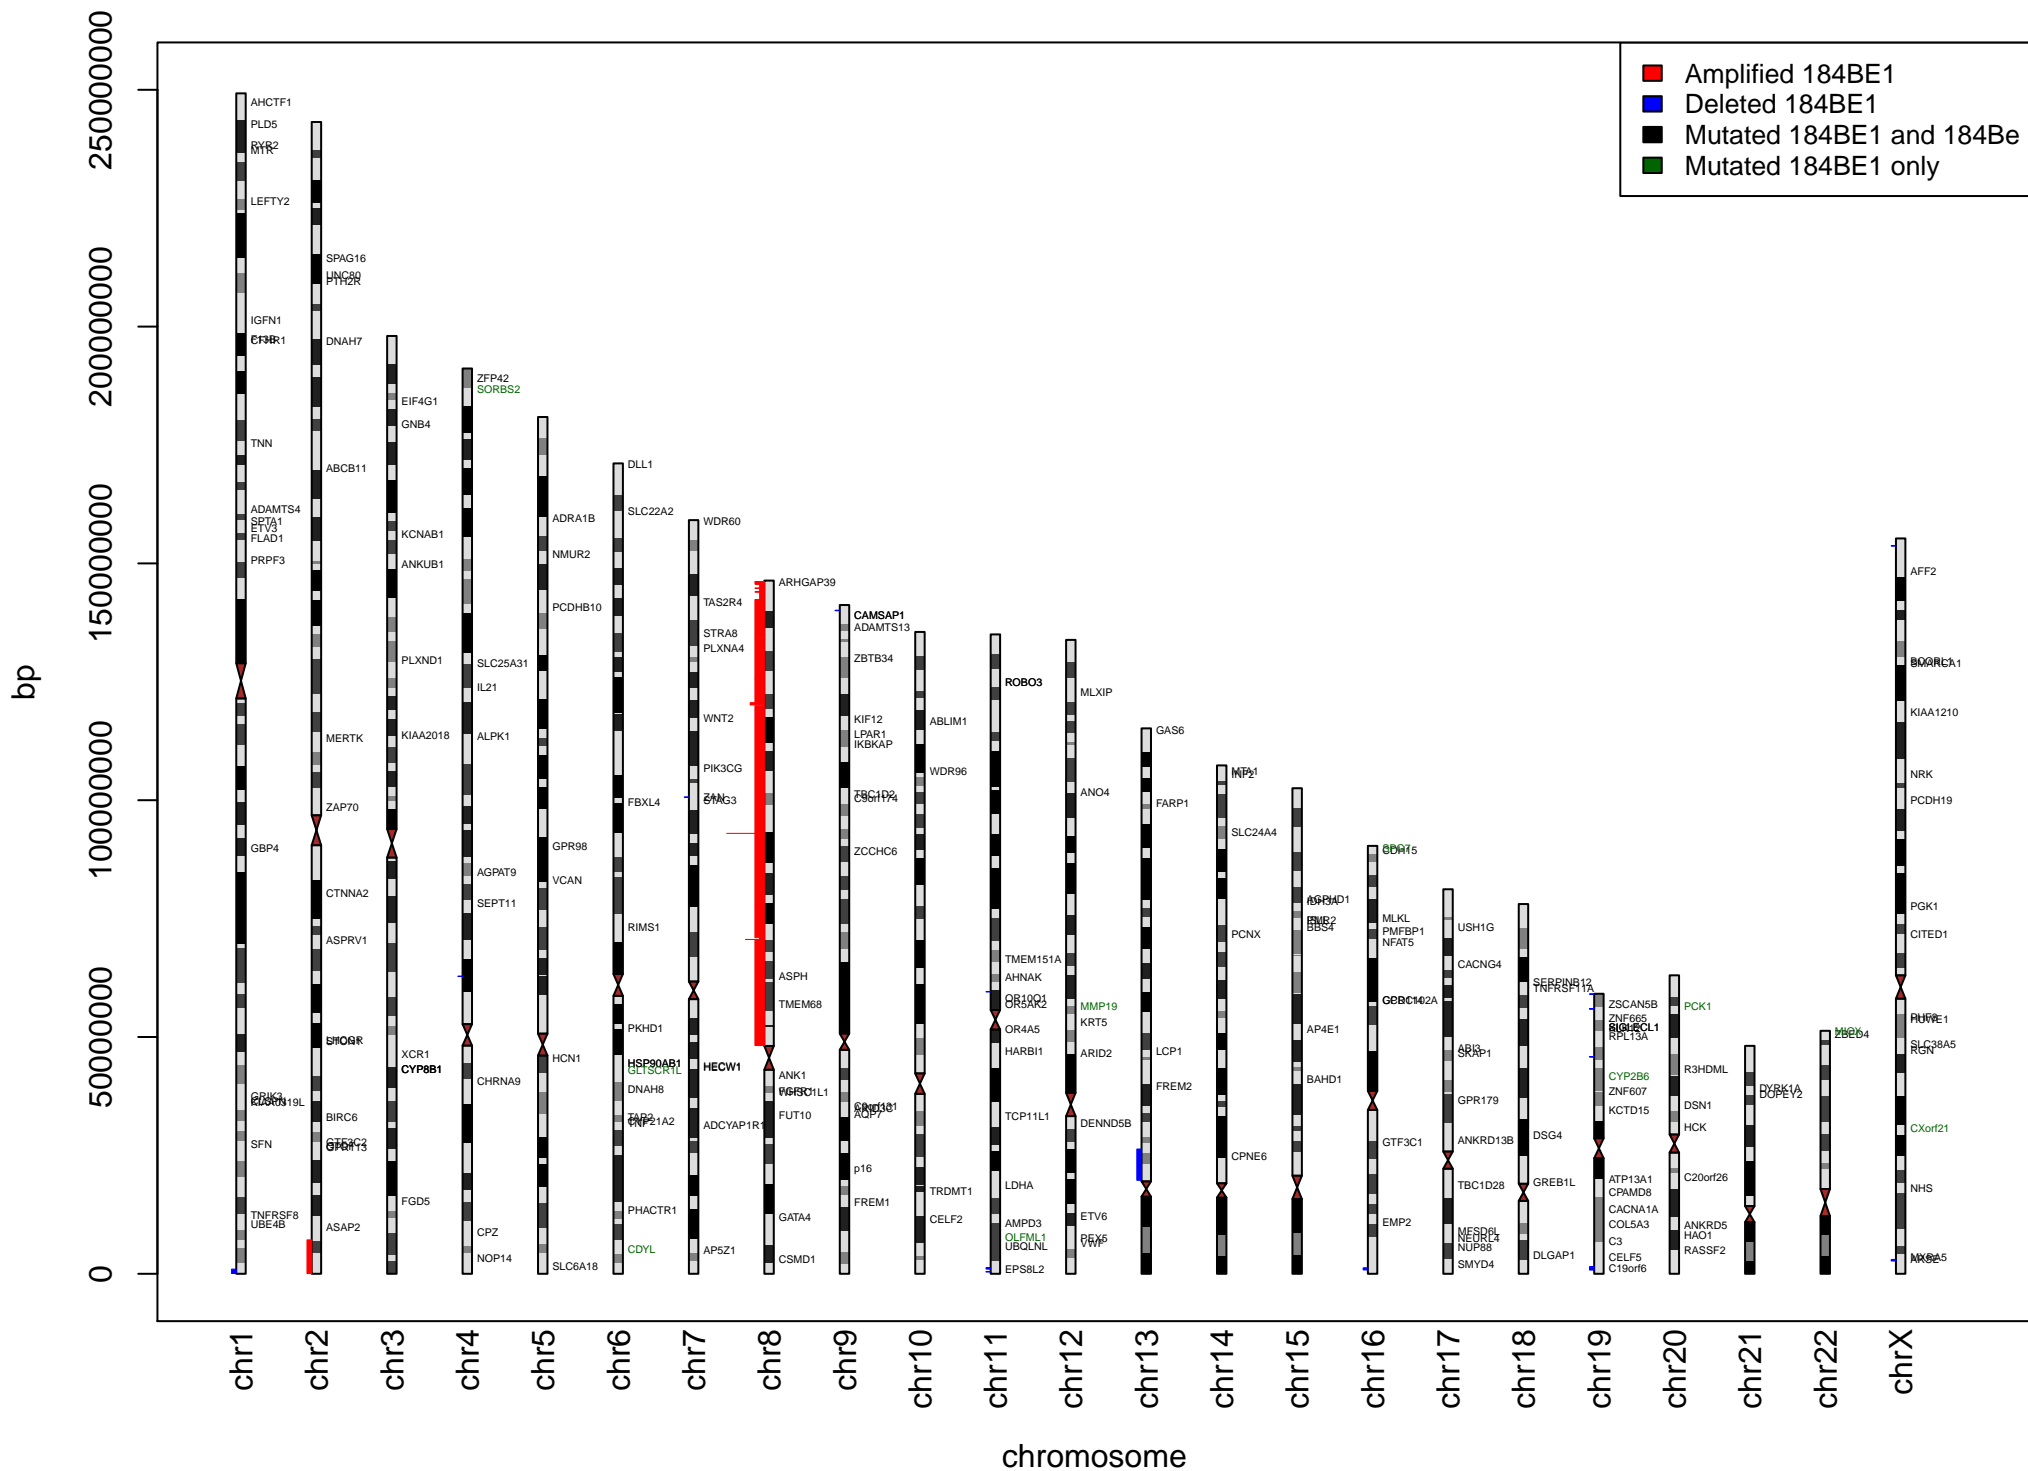

Supplement: NIHMS641449-supplement-3.pdf [file NIHMS641449-supplement-3.pdf]
